# Supplementary material for: Anticancer activity of novel silicon phthalocyanines against the colorectal adenocarcinoma cell line (DLD-1)
Source: Royal Society of Chemistry journal article supplement (doi:10.1039/d2nj02891c), 2022-01-01
Supplement: d2nj02891c1.pdf [file d2nj02891c1.pdf]

## Anticancer activity of novel silicon phthalocyanines against colorectal adenocarcinoma cell line (DLD-1)

Nazli Farajzadeh<sup>a</sup>, Nilgün Güler Kuşçulu<sup>b</sup>, H. Yasemin Yenilmez<sup>a</sup>, Dilek Bahar<sup>c</sup> and Zehra Altuntaş Bayır<sup>\*a</sup>

<sup>a</sup> Department of Chemistry, Istanbul Technical University, TR-34469 Istanbul, Turkey.

<sup>b</sup> Department of Chemistry Technology, Mustafa Çıkrıkçıoğlu Vocational School, Kayseri University, TR-38280 Kayseri, Turkey.

<sup>c</sup> Genome & Stem Cell Center (GENKOK), Erciyes University, TR-38280 Kayseri, Turkey.

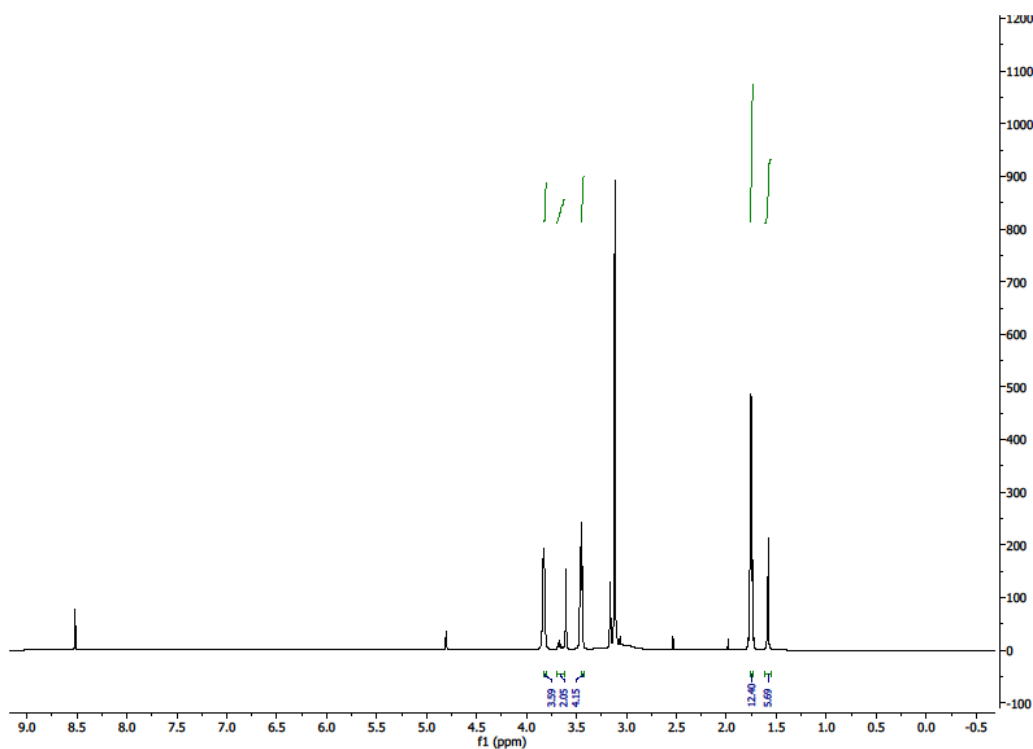

<sup>1</sup>H NMR spectrum of compound **2**

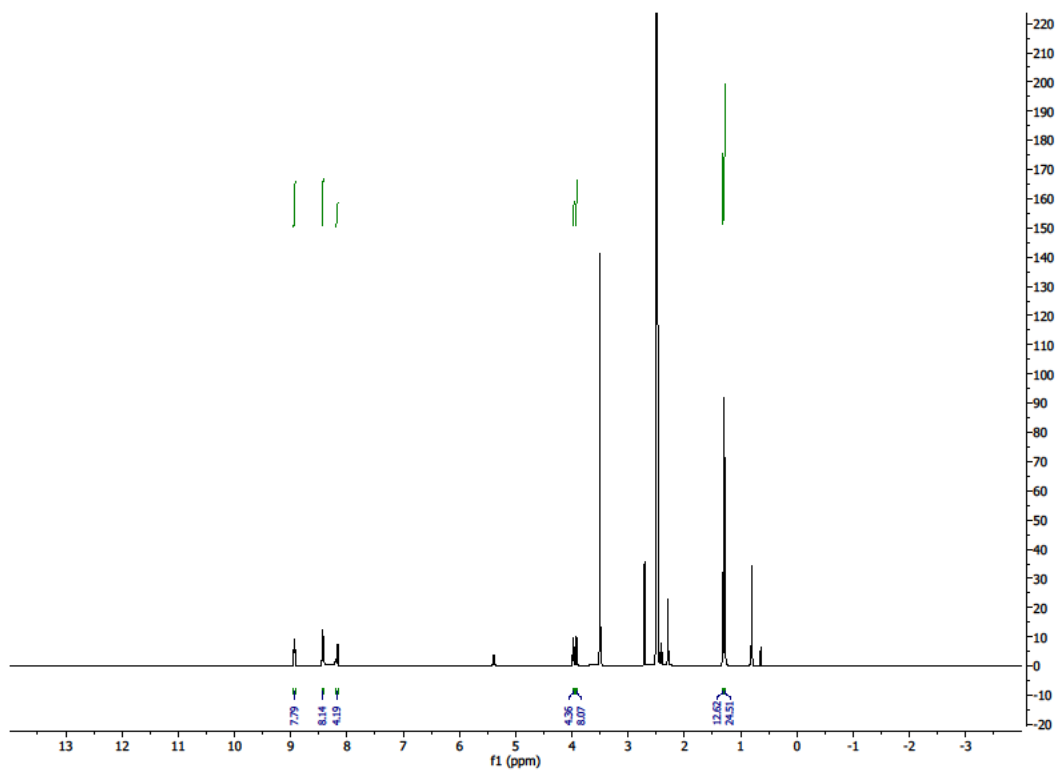

<sup>1</sup>H NMR spectrum of compound **2-Si**

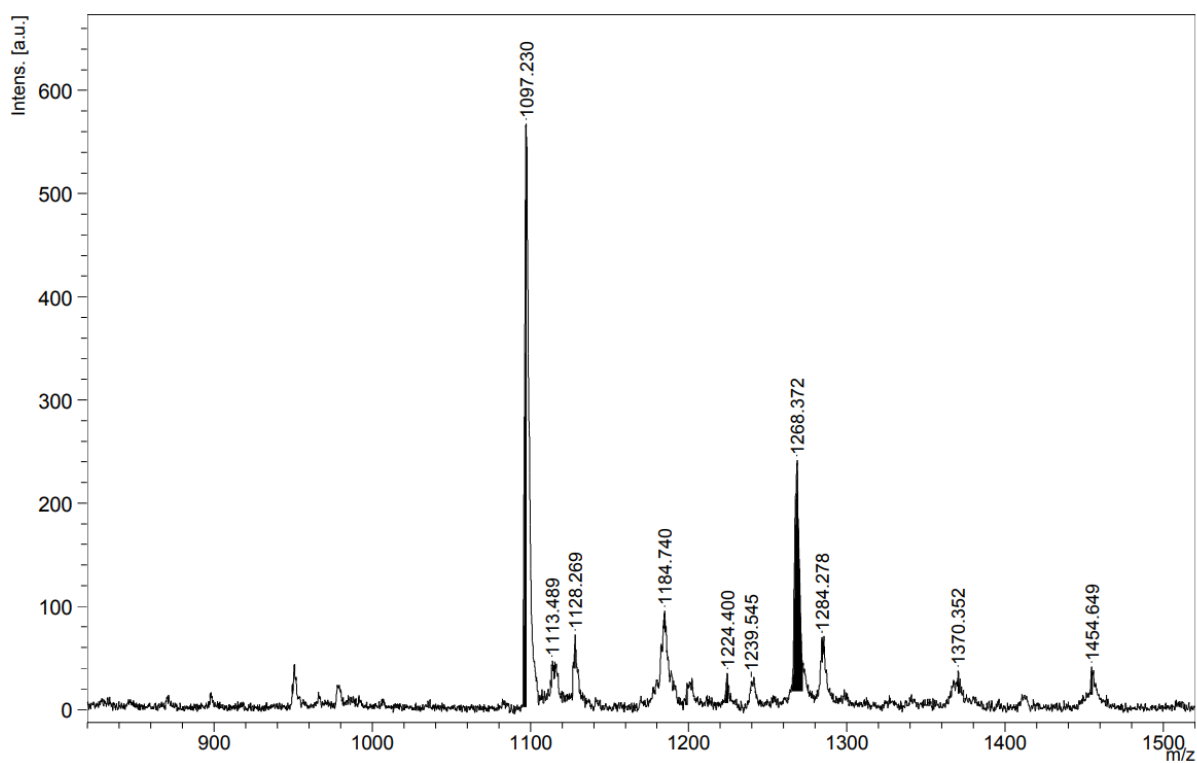

Mass spectrum of compound **2-Si**

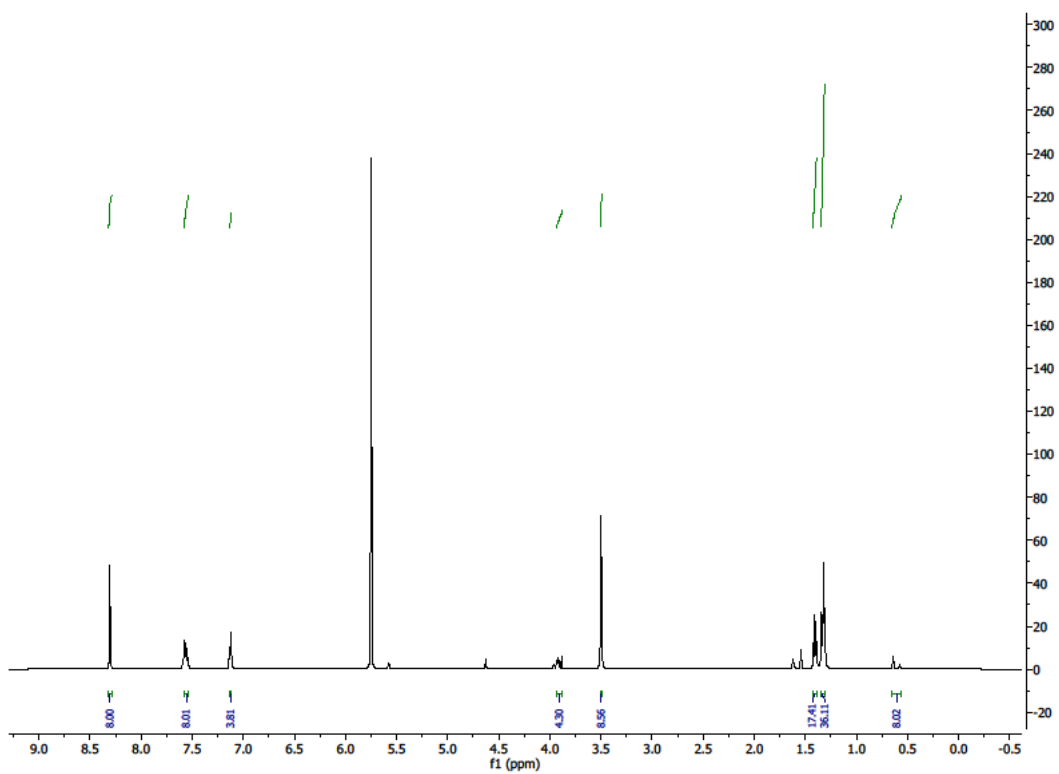

<sup>1</sup>H NMR spectrum of compound **2-QSi**

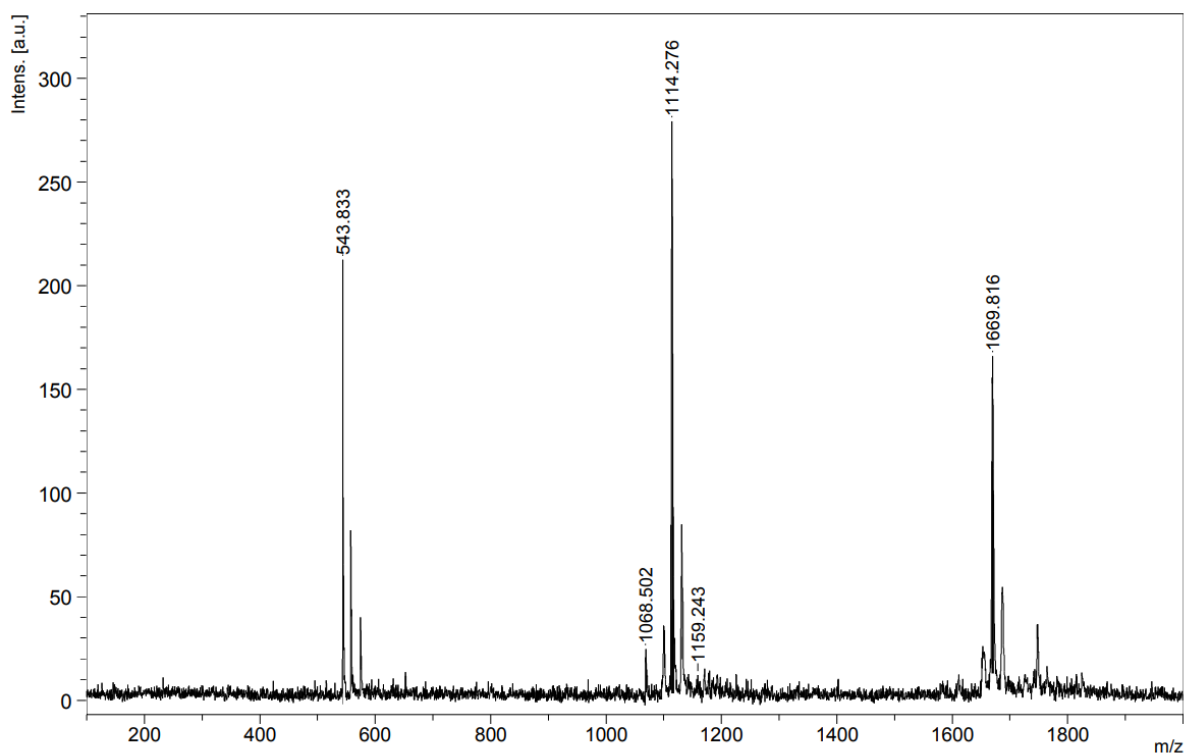

Mass spectrum of compound **2-QSi**

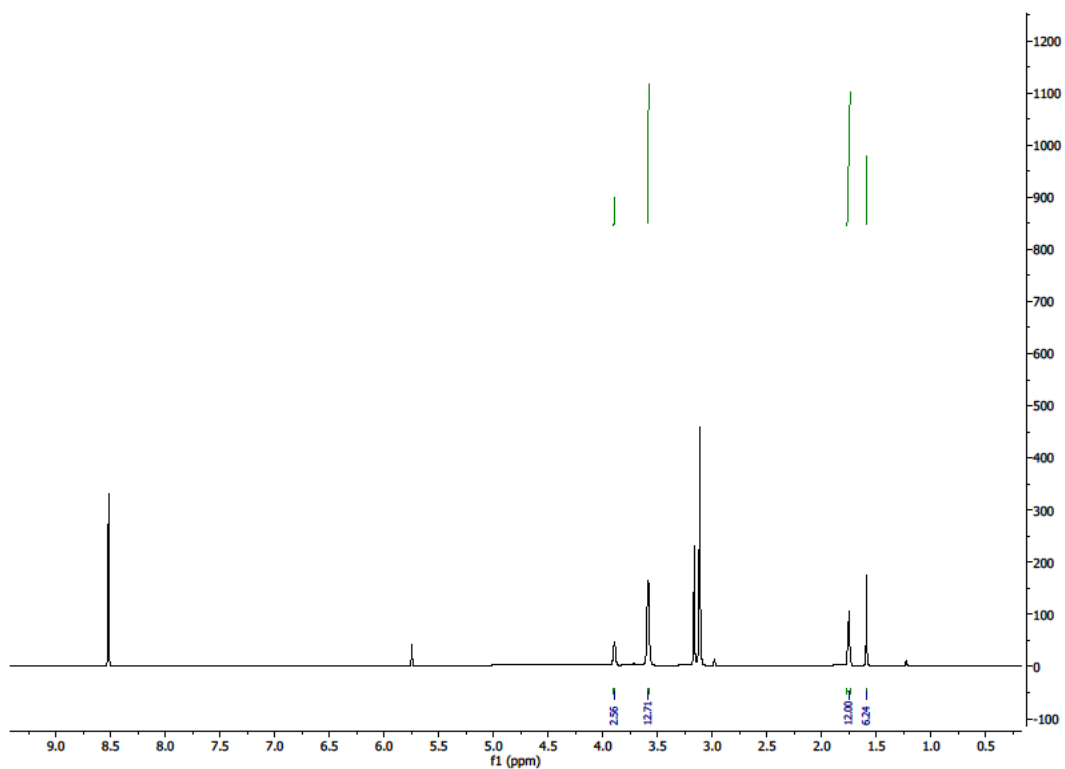

$^1\text{H}$  NMR spectrum of compound **3**

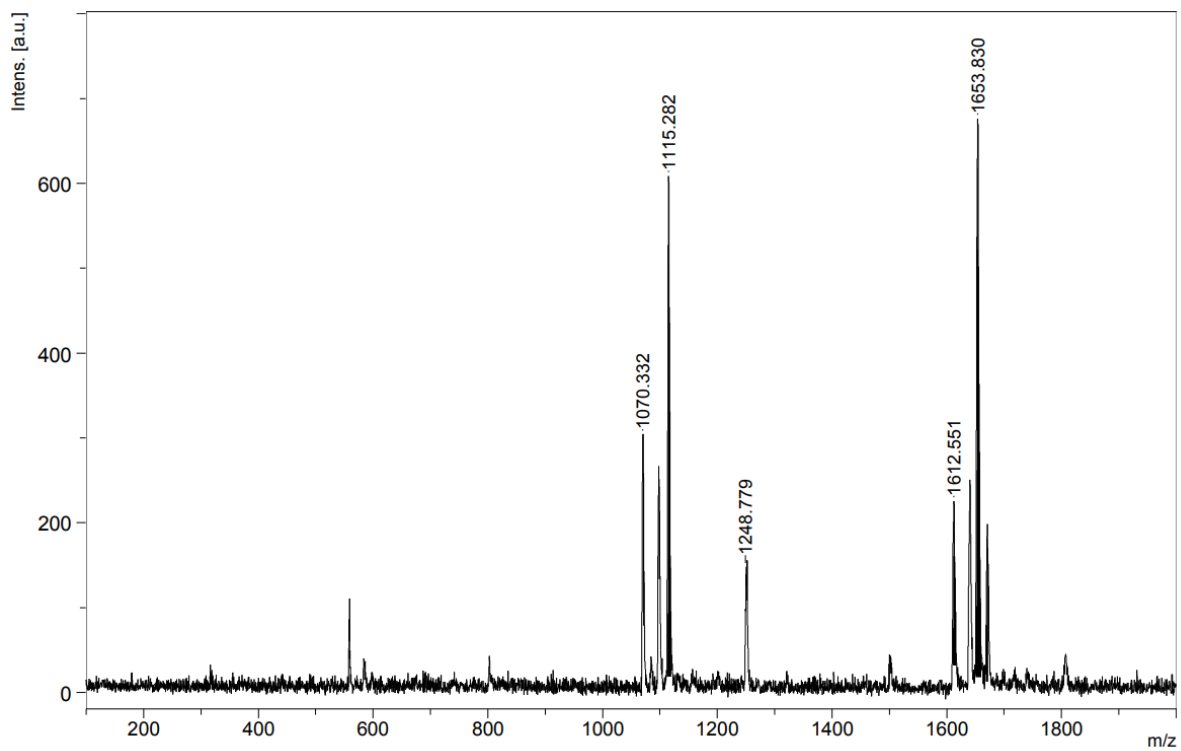

Mass spectrum of compound **3-Si**

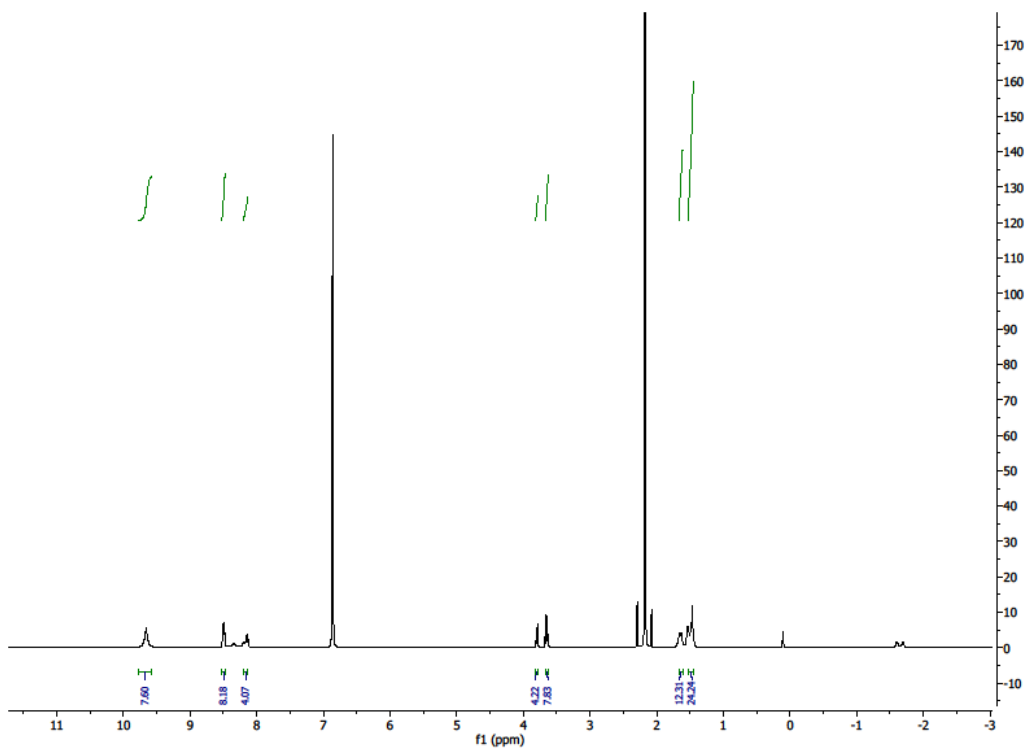

<sup>1</sup>H NMR spectrum of compound 3-Si

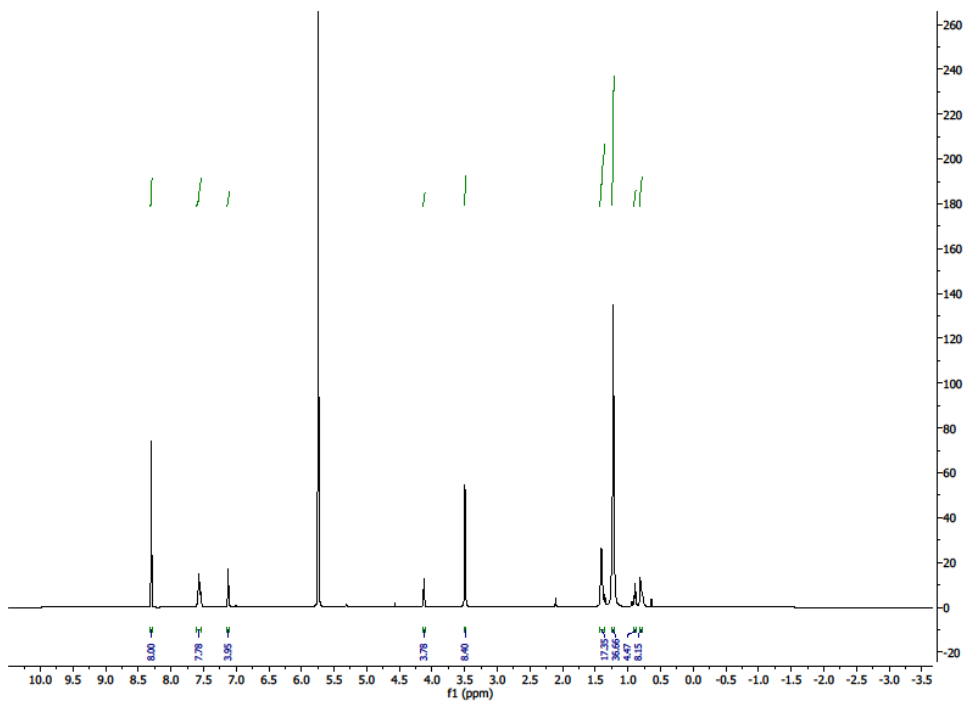

<sup>1</sup>H NMR spectrum of compound 3-QSi

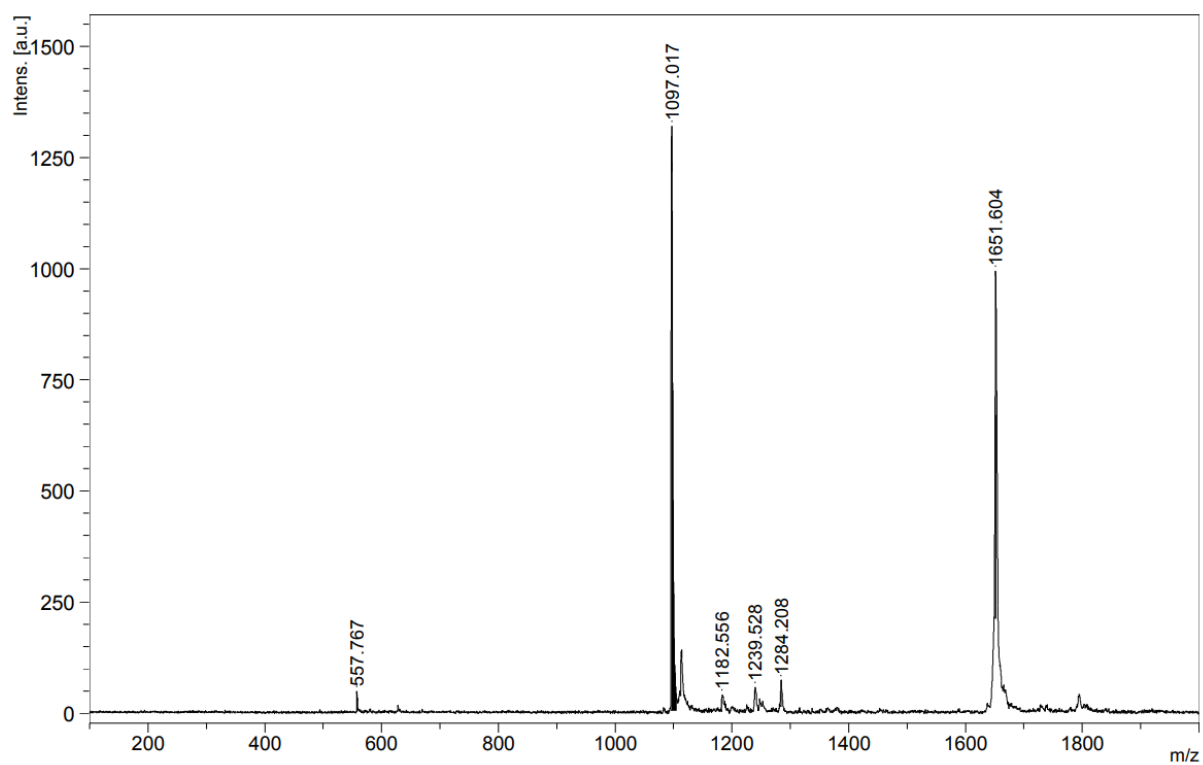

Mass spectrum of compound **3-QSi**

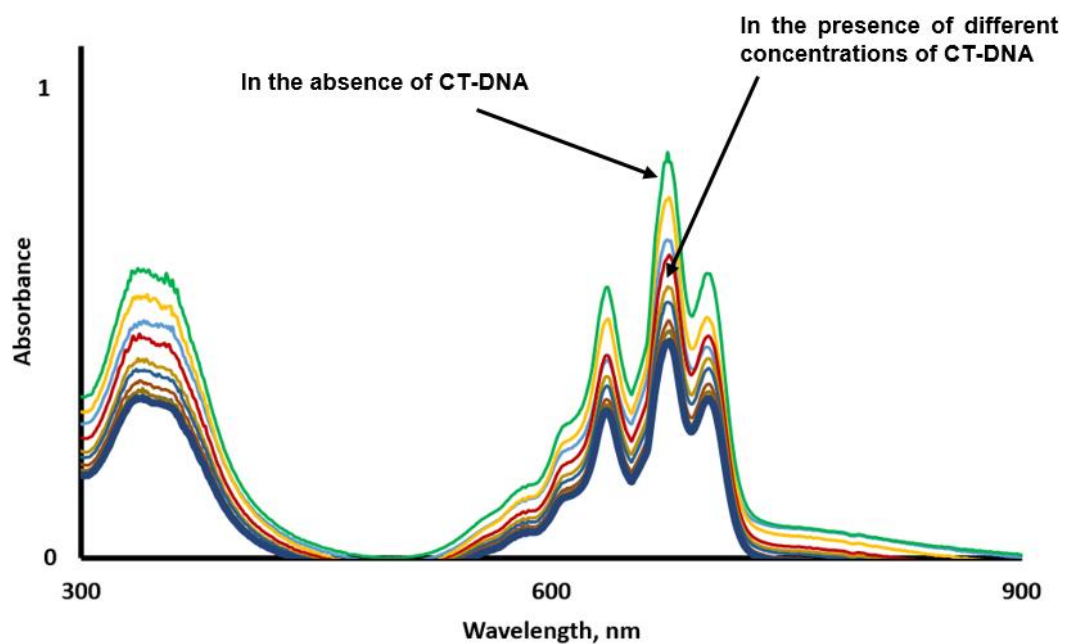

The UV-vis spectra of compound **2-QSi** in the absence and presence of different concentrations of CT-DNA (0.25-2 mg/mL)

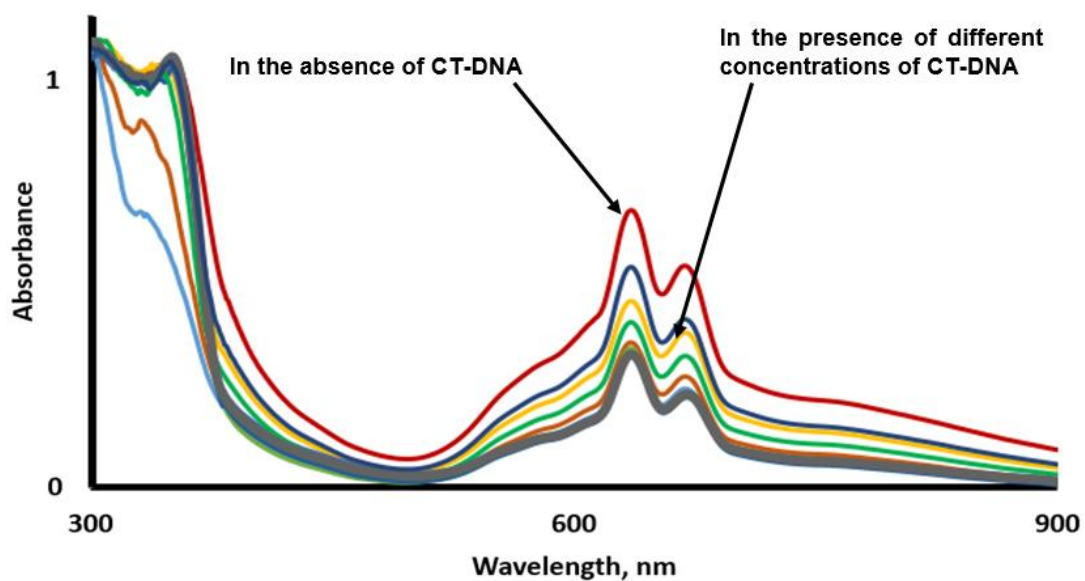

The UV-vis spectra of compound **3-QSi** in the absence and presence of different concentrations of CT-DNA (0.25-2 mg/mL)

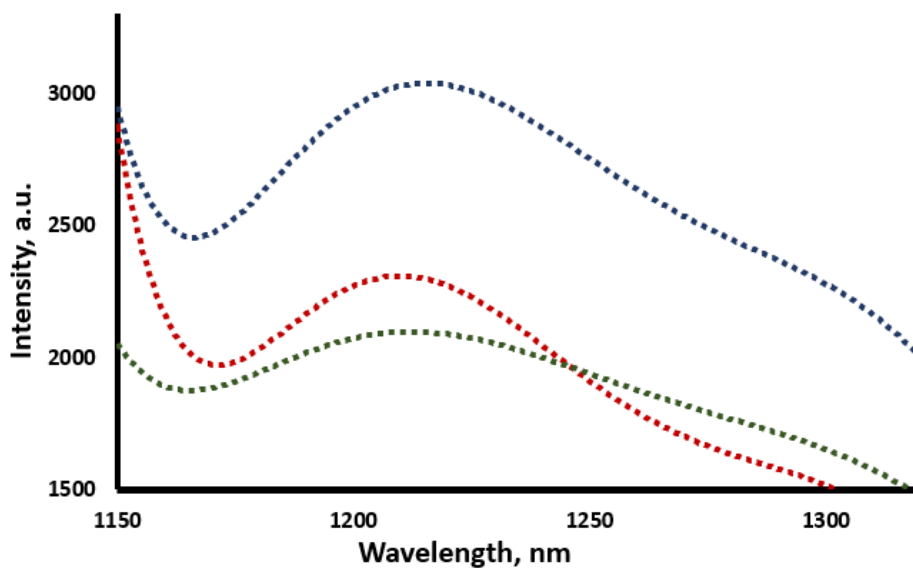

Singlet oxygen phosphorescence with sensitization of compounds (**1-3-QSi**) in DMSO (**1-QSi**: green; **2-QSi**: red; **3-QSi**: blue).
